# Supplementary material for: Predicting physiological aging rates from a range of quantitative traits using machine learning
Source: PubMed Central journal article supplement (PMC8580337; doi:10.18632/aging.203660), 2021-10-29
Supplement: aging-13-203660-s003.pdf [file aging-13-203660-s003.pdf]

## SUPPLEMENTARY TABLE

**Supplementary Table 1. Common clinical and cardiovascular traits included in the common-trait model for the SardiNIA study.**

| <b>Trait</b>     | <b>Units/Measurement</b> | <b>Description</b>                      |
|------------------|--------------------------|-----------------------------------------|
| labsRBC          | 10 <sup>6</sup> /uL      | Red blood cell count                    |
| labsHB           | g/dL                     | Hemoglobin lab test                     |
| labsMCV          | fL                       | Mean corpuscular volume                 |
| labsMCH          | pg                       | Mean corpuscular hemoglobin             |
| labsWBC          | 10 <sup>3</sup> /uL      | White blood cell count                  |
| labsPercNE       | percentage               | Neutrophil percentage                   |
| labsPercLY       | percentage               | Lymphocyte percentage                   |
| labsPercMO       | percentage               | Monocyte percentage                     |
| labsPercEO       | percentage               | Eosinophil percentage                   |
| labsPercBA       | percentage               | Basophils percentage                    |
| V1_V5            |                          |                                         |
| labsPLT          | 10 <sup>3</sup> /uL      | Platelet count                          |
| labsHBF          | percentage               | Fetal hemoglobin test                   |
| labsHBA2         | percentage               | Hemoglobin A2 test                      |
| labsG6PD         | UI/dL                    | Glucose-6-phosphate dehydrogenase level |
| labsGlicemia     | mg/dL                    | Glucose level                           |
| labsInsulinemia  | mg/dL                    | Insulin level                           |
| labsAzotemia     | mg/dL                    | Nitrogen level                          |
| labsALT          | U/L                      | Alanine aminotransferase test           |
| labsAST          | U/L                      | Aspartate aminotransferase test         |
| labsGammaGT      | U/L                      | Gamma-glutamyltransferase test          |
| labsFibrinogeno  | mg/dL                    | Fibrinogen level                        |
| labsSideremia    | mg/dL                    | Iron level                              |
| labsTransferrina | mg/dL                    | Transferrin level                       |
| labsBilirubinad  | mg/dL                    | Fractionated bilirubin level            |
| labsBilirubinat  | mg/dL                    | Total bilirubin level                   |
| labsAcidourico   | mg/dL                    | Uric acid level                         |
| labsSodiemia     | mEq/L                    | Sodium level                            |
| labsPotassiemia  | mEq/L                    | Potassium level                         |
| labsVES          | mm/h                     | Erythrocyte sedimentation rate          |
| labsPCR          | mg/dL                    | C-reactive protein level                |
| labsTSH          | uU/L                     | Thyroid stimulating hormone level       |
| labsFt4          | mg/dL                    | Thyroid Ft4 level                       |
| assayAdip        | mg/mL                    | Adiponectin level                       |
| assayLeptin      | pg/mL                    | Leptin level                            |
| assayMCP1        | pg/mL                    | Monocyte chemoattractant protein level  |
| assayIL6         |                          | Interleukin-6 level                     |

|                  |                   |                                 |
|------------------|-------------------|---------------------------------|
| labsMCHC         |                   |                                 |
| labsHtc          |                   |                                 |
| labsMO_COUNT     |                   |                                 |
| labsEO_COUNT     |                   |                                 |
| labsBA_COUNT     |                   |                                 |
| labsLY_COUNT     |                   |                                 |
| labsNE_COUNT     |                   |                                 |
| labsCreatinina   | mg/dL             | Serum creatinine level          |
| labsColesterolo  | mg/dL             | Total cholesterol level         |
| labsHDL          | mg/dL             | HDL cholesterol level           |
| labsTrigliceridi | mg/dL             | Triglycerides level             |
| exmHeight        | cm                | Height                          |
| exmWeight        | kg                | Weight                          |
| exmWaist         | cm                | Waist circumference             |
| exmHip           | cm                | Hip circumference               |
| exmBMI           | kg/m <sup>2</sup> | Body mass index                 |
| exmBPsys_jbs     |                   | Supine blood pressure systolic  |
| exmBPdia_jbs     |                   | Supine blood pressure diastolic |
| pwv              | cm/s              | Pulse wave velocity             |
| vasPSV           |                   | Peak systolic velocity          |
| vasEDV           | mL                | End diastolic velocity          |
| vasIP            |                   | Pulsatility index               |
| vasSDratio       |                   | Systolic-diastolic ratio        |
| vasAT            |                   | Acceleration time               |
| vasvti           |                   | Integral time velocity          |
| vasSysDiam       |                   | Systolic CCA diameter           |
| vasDiaDiam       |                   | Diastolic CCA diameter          |
| vasIMT           |                   | CCA intima media thickness      |

---

Full trait descriptions for SardinIA and InCHIANTI are available in the Supplementary Materials.
